## N-doped three-dimensional carbon foam as binder-free electrode for organic pollutants removal by electro-Fenton in neutral medium

Jujiao Zhao, Xie Quan <sup>\*</sup>, Shuo Chen  and Hongtao Yu 

Key Laboratory of Industrial Ecology and Environmental Engineering (Ministry of Education, China), School of Environmental Science and Technology, Dalian University of Technology, Dalian 116024, China

\*Corresponding author. E-mail: quanxie@dlut.edu.cn

### Abstract

Electro-Fenton in neutral medium has attracted more and more attention since it can relieve the costs of H<sub>2</sub>O<sub>2</sub> storage and pH adjustment, which are the major disadvantages limiting the practical applications of Fenton reaction. The electrode with good performance for electrochemical H<sub>2</sub>O<sub>2</sub> production from O<sub>2</sub> in neutral medium is of great importance in electro-Fenton. Herein, the N-doped three-dimensional carbon foam (NCF) electrode was obtained by using melamine foam as precursor. The nitrogen functional groups and graphitization degree could be tailored by adjusting the carbonization temperature. NCF1000, the sample carbonized at 1,000 °C, presents the H<sub>2</sub>O<sub>2</sub> selectivity of 81.9%, which is the highest among those of other NCFs. The H<sub>2</sub>O<sub>2</sub> concentration in neutral medium on NCF1000 achieved 0.87 mmol L<sup>-1</sup> at -0.6 V, which is 1.8, 2 and 2.6 times as much as those on graphite, carbon cloth and carbon felt. Using as cathode in electro-Fenton, NCF1000 exhibits the kinetic rate of 0.062 min<sup>-1</sup> for phenol degradation, which is 4.1 times larger than that on graphite electrode. As well, the performance of NCF1000 shows no visible attenuation after ten times phenol removal experiments, demonstrating its good reusability. These results indicate the potential of NCF as a promising alternative for commercial carbon-based electrode in electro-Fenton.

**Key words:** electro-Fenton, N-doped carbon, neutral medium, organic pollutants control, oxygen reduction reaction

### INTRODUCTION

Generating hydroxyl radicals ( $\bullet\text{OH}$ ) from H<sub>2</sub>O<sub>2</sub> for the degradation of organic pollutants, which is generally called the Fenton reaction, is one of the advanced oxidation processes and has attracted increasing attention as an effective and environmentally friendly technology (Nidheesh & Gandhimathi 2012; Hammouda *et al.* 2016; Moreira *et al.* 2017). The hydroxyl radicals are non-selective oxidants with a high oxidation potential of 2.8 eV (in the gas phase) and can react with most organic contaminants to decompose them into CO<sub>2</sub> and other inorganic ions (Liu *et al.* 2015a; Wang *et al.* 2015a; Xu *et al.* 2016). However, although the traditional Fenton reaction has been employed for wastewater treatment, there are still two major challenges which limit its widespread application: (1) the storage and the transportation of H<sub>2</sub>O<sub>2</sub> require high safety standards and will generate extra costs, which are even higher than the costs of H<sub>2</sub>O<sub>2</sub> itself (Yang *et al.* 2007; Zhang *et al.* 2011; Hammouda *et al.* 2016);

This is an Open Access article distributed under the terms of the Creative Commons Attribution Licence (CC BY-NC-ND 4.0), which permits copying and redistribution for non-commercial purposes with no derivatives, provided the original work is properly cited (<http://creativecommons.org/licenses/by-nc-nd/4.0/>)

(2) the pH of the wastewater must be adjusted to near-acidic ( $\text{pH} = 2\text{--}4$ ), resulting in a more expensive and complicated treatment process (Nidheesh & Gandhimathi 2012).

Electro-Fenton system is an efficient technology to overcome the first challenge, as it *in situ* produces  $\text{H}_2\text{O}_2$  by electrochemical reduction of  $\text{O}_2$  (Jirkovský *et al.* 2011; Luo *et al.* 2015; Sklari *et al.* 2015; Perazzolo *et al.* 2015; Plakas *et al.* 2016; Zhao *et al.* 2018a). The second challenge can be solved by combining electro-Fenton technology with heterogeneous Fenton-like catalysts, which can catalyze  $\text{H}_2\text{O}_2$  to produce  $\cdot\text{OH}$  in neutral medium (Wang *et al.* 2013; Zhang *et al.* 2015a, 2015b). Thus, the electro-Fenton system in neutral medium, which can overcome both of the challenges of the traditional Fenton system, has attracted much more attention (Li *et al.* 2009; Sun *et al.* 2015; Jiang *et al.* 2016; Zhao *et al.* 2016). However, the kinetics of electrochemical reduction of  $\text{O}_2$  in neutral medium are sluggish (Li *et al.* 2009; Liu *et al.* 2015b; Jiang *et al.* 2016), which significantly limits the efficiency of this technology, leading to a high demand for cathode electrocatalysts with good performance (Wang *et al.* 2015b; Zhao *et al.* 2018b).

Carbon-based materials have been widely used as electrodes for electrochemical  $\text{H}_2\text{O}_2$  production from  $\text{O}_2$  due to the good conductivity, high selectivity, good stability and low price (Khataee *et al.* 2011; Zhou *et al.* 2013; Moreira *et al.* 2014; Le *et al.* 2016). However, since the  $\text{H}_2\text{O}_2$  production performance of these materials is poor in neutral medium, further improvement is urgently needed. Doping nitrogen atoms into carbon materials is an effective method to adjust the electrochemical properties of the carbon-based catalysts due to the different electronegativity between nitrogen and carbon (Zhang *et al.* 2008; Wei *et al.* 2014). N-doped carbon materials have been reported as catalysts with good electrochemical activity for oxygen reduction reaction (ORR) in alkaline through the four-electron pathway (Liao *et al.* 2015; Liu *et al.* 2015c; López-Salas *et al.* 2016). Interestingly, several recent works show that the selectivity of  $\text{O}_2$  reduction on N-doped carbon materials highly depends on the types of nitrogen functional groups and the applied pH of the electrolyte (Fellinger *et al.* 2012; Lee *et al.* 2012; Park *et al.* 2014; Sheng *et al.* 2015; Noffke *et al.* 2016), suggesting a strong possibility that N-doped carbon materials could be electrocatalysts with superior performance for electrochemical  $\text{H}_2\text{O}_2$  production from  $\text{O}_2$  in neutral medium (Lee *et al.* 2012; Noffke *et al.* 2016).

Many methods have been developed to synthesize N-doped carbon electrode, such as chemical vapor deposition, hydrothermal, and so on (Zhang *et al.* 2008; Fellinger *et al.* 2012; Chen *et al.* 2013; Wei *et al.* 2014; Liu *et al.* 2015c). Among these methods, forming N-doped three-dimensional carbon foam by carbonizing the N-containing precursor with three-dimensional structure presents significant advantages (Lee *et al.* 2012; Chen *et al.* 2013; Sheng *et al.* 2015). The three-dimensional structure can facilitate the mass transfer, which is beneficial to enhance  $\text{H}_2\text{O}_2$  production from  $\text{O}_2$  reduction (Chen *et al.* 2013; Zhang *et al.* 2015c). Furthermore, the self-support electrode with absence of conductive polymer as binder has a better durability than the traditional electrode during the oxidation of pollutants in electro-Fenton system (Zhang *et al.* 2015c).

Herein, we synthesized the N-doped three-dimensional carbon foam (NCF) by simply carbonizing commercial melamine foam under Ar atmosphere and evaluated it as electrocatalyst for electrochemical production of  $\text{H}_2\text{O}_2$  from  $\text{O}_2$  in neutral medium. The relationship between the nitrogen functional groups and the selectivity of  $\text{O}_2$  reduction in neutral medium was investigated. The NCF was further employed as cathode in the electro-Fenton system in neutral medium for organic pollutants' removal and its performance was compared to several commercial electrodes to evaluate its potential for practical applications. The results of this work not only provide a cheap and efficient cathode for electro-Fenton, but also contribute to the understanding of  $\text{O}_2$  reduction mechanism on N-doped carbon in neutral medium.

## EXPERIMENTAL

### Materials

Melamine foam was supplied by Haohua-Junhua Group Co. Ltd, China. Carbon cloth, carbon felt, and graphite electrode were purchased from Hesen company.  $\text{H}_2\text{SO}_4$ , NaOH, and  $\text{Na}_2\text{SO}_4$  were supplied by Tianjin Bodi Chemical Reagent Co. Ltd. The concentration of  $\text{H}_2\text{SO}_4$  is 18.4 mol/L (98 wt%). The NaOH and  $\text{Na}_2\text{SO}_4$  are chemically pure. Phenol, atrazine, and bisphenol A were supplied by Aladdin company. Nafion solution was PFSA polymer dispersion D-520 with a concentration of 5 wt% from Dupont. The Nafion 117 proton exchange membrane was also purchased from Dupont.

### Synthesis of N-doped three-dimensional carbon foam (NCF)

In a typical process, the melamine foam was carbonized at 800 °C with a heating rate of 5 °C min<sup>-1</sup> for 2 h under Ar atmosphere. Three obtained black samples carbonized at 650 °C, 800 °C, and 1,000 °C were named as NCF650, NCF800, and NCF1000, respectively. With heat treatment temperature of 1,100 °C, the sample collapsed and could not be used as a self-supporting electrode.

### Physicochemical characterization

The Shimadzu LabX XRD-6000 was employed to reveal the X-ray diffraction (XRD) patterns. Raman spectra were recorded by Renishaw System 2000 with a wavelength of 623.8 nm (He-Ne laser excitation). Elemental mapping was measured by the Iridium Ultra Premium EDS System (A550I, IXRF, USA) for 10 minutes. VG ESCALAB 250 spectrometer was used to reveal the X-ray photoelectron spectra (XPS) of samples. Hitachi S-4800 microscope was used to record the scanning electron microscopy (SEM) images.  $\text{N}_2$  adsorption-desorption isotherms were measured at 77 K with a Quadasorb instrument.

### Electrochemical characterization

The electrochemical workstation (CHI 760E) and a three-electrode cell were employed to conduct the electrochemical tests at room temperature. The reference electrode was saturated Hg/HgO electrode (SCE) and the Pt wire was used as counter electrode. 0.1 M  $\text{Na}_2\text{SO}_4$  was used as electrolyte for all the electrochemical measurements. The pH of the solution was adjusted by 1 M KOH and 1 M  $\text{H}_2\text{SO}_4$ . Pure  $\text{O}_2$  or  $\text{N}_2$  was flowed into the solution for 0.5 h before tests to ensure the solution was saturated by  $\text{O}_2$  or  $\text{N}_2$ . A two-chamber reactor was used for the  $\text{H}_2\text{O}_2$  production experiment and a one-chamber reactor with a volume of 20 mL was used for both the  $\text{H}_2\text{O}_2$  production and pollutants' removal experiments. Both of the reactors are rectangular. The two-chamber reactor was divided by the Nafion 117 proton exchange membrane. The volume of the solution during the reaction in each chamber was 20 mL. No stirring was conducted during the production of  $\text{H}_2\text{O}_2$  experiments. The reaction temperature was not controlled during all the experiments. However, since the room temperature of the laboratory was controlled by air conditioning and the electrochemical reactions in this work do not lead to a huge change in temperature, the reaction temperature could be the same as the room temperature, which is around 25 °C.

Cyclic voltammetry (CV) measurements were operated with the scan rate of 10 mV s<sup>-1</sup>. Linear sweep voltammograms (LSVs) were collected from a rotating ring-disk electrode (RRDE) system (Pine Instrumentation, USA) with a platinum/glassy carbon RRDE at 1,600 rpm.  $\text{H}_2\text{O}_2$  selectivity was calculated from the following equation (Lee *et al.* 2012; Park *et al.* 2014):

$$\text{H}_2\text{O}_2\% = (200 \times I_r/N)/(I_r/N + I_d) \quad (1)$$

where  $I_r$  and  $I_d$  were the disk current and ring current, respectively. The  $N$  was 0.37, which was the collection efficiency of Pt ring. The current efficiency was calculated by the following equation:

$$CE = 100\% \times nFCV/It \quad (2)$$

where  $n$  is the electron number,  $F$  is the Faraday constant (96,485 C/mol),  $C$  is the concentration of  $H_2O_2$ ,  $V$  is the solution volume,  $I$  is the current, and  $t$  is the time. The electro-Fenton treatment of pollutants and  $H_2O_2$  production were measured with the effective working electrode area of  $4 \text{ cm}^2$  (rectangular,  $2 \text{ cm} \times 2 \text{ cm}$ ). The working electrode was facing the counter-electrode and the distance between the electrodes was 2.5 cm. A 20 mL solution of  $20 \text{ mg L}^{-1}$  pollutants (phenol, atrazine or bisphenol A) was used as electrolyte. Commercial  $FeOOH$  was used as Fenton reagent during the process and the solution was stirred by magnetic stirrer with the speed of 600 rpm. The flow rate of  $O_2$  was 300 mL/min. The illustration of the experimental apparatus can be seen in Figure 1.

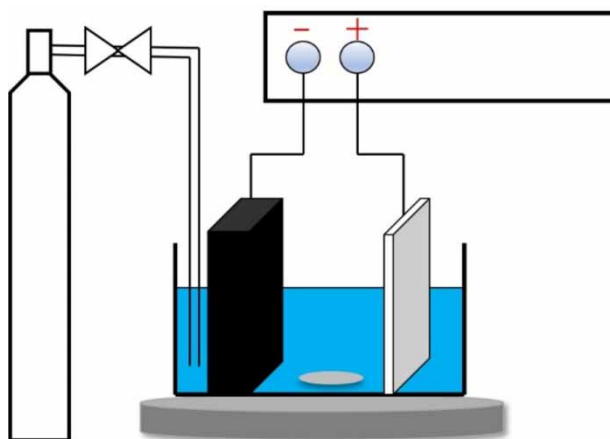

**Figure 1** | Illustration of the experimental apparatus.

### Analytical methods

$H_2O_2$  concentration was analyzed by the flow-injection chemiluminescence method (MIP-B, Xi'an Remex, China). The Waters 2695, high-performance liquid chromatography, was employed to investigate the concentration of phenol, bisphenol A and atrazine. The multi N/C2100S (Analytikjena, Germany) was employed to measure the total organic carbon (TOC). The chemical oxygen demand (COD) was monitored according to the standard method of China. Electron paramagnetic resonance (EPR) spectrometer was employed to identify reactive species during the electro-Fenton process (300E, Bruker, Germany). 5,5-Dimethyl-1-pyrroline-N-oxide (DMPO) was chosen as the spin trap agent.

## RESULTS AND DISCUSSION

### Characterizations of NCF electrode

As shown in Figure 2(a), the melamine foam was successfully transformed into black NCF after the carbonization process. SEM images (Figure 2(b) and 2(c)) show the three-dimensional structure of the NCF1000, and the strut of the foam has a diameter of  $1.5\text{--}2 \mu\text{m}$ . The samples kept the foam

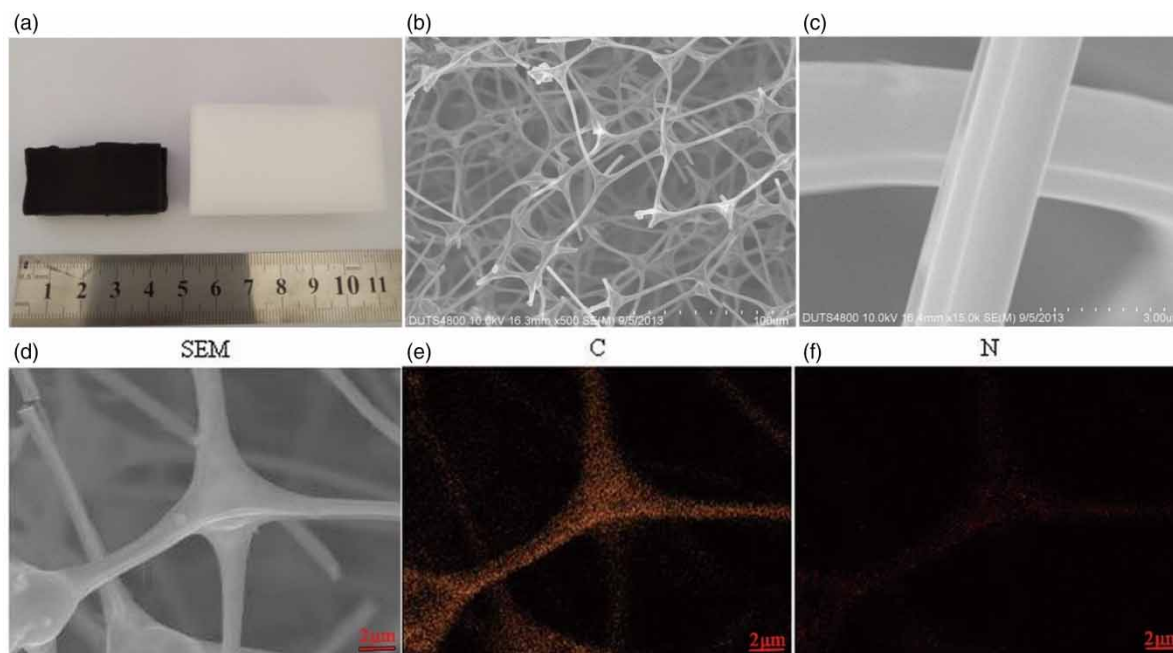

**Figure 2** | (a) Photograph of NCF and melamine foam, (b and c) SEM images of NCF1000, the EDS mapping scan of (d) the SEM image of NCF1000, (e) C element of NCF1000, (f) N element of NCF1000.

structure and can be used as electrode without any conductive binder. EDS mapping scan is shown in Figure 2(d)–2(f). It reveals that C and N are uniformly distributed in the sample.

XRD patterns of NCF650, NCF800, and NCF1000 are shown in Figure 3(a). The broad peak centered at  $26^\circ$  represents the C (002) facet, demonstrating the successful transformation of melamine to graphitic carbon during the carbonization. With a higher carbonization temperature, the C (002) peak becomes narrow and the peak located at  $43^\circ$  corresponding to the C (100) facet could be found in the patterns of NCF800 and NCF1000. The results reveal that higher carbonization temperature leads to higher graphitization degree. Raman spectra of the three samples present the D band peak located at  $1,350\text{ cm}^{-1}$  and the G band peak located at  $1,580\text{ cm}^{-1}$  (Figure 3(b)). Generally, lower D/G peak intensity ratio ( $I_D/I_G$ ) reveals less disordered atoms in graphitic carbon. The  $I_D/I_G$  values for NCF650, NCF800, and NCF1000 are 1.16, 1.07, and 1.02, respectively. The sample with higher

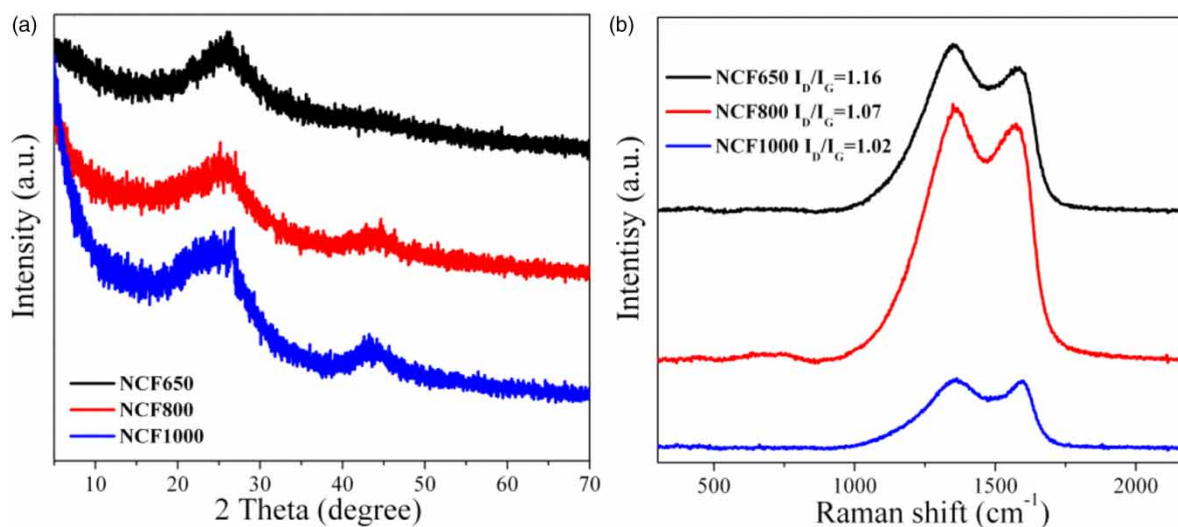

**Figure 3** | (a) The XRD patterns and (b) the Raman spectra of NCF650, NCF800, and NCF1000.



carbonization temperature shows a decreased  $I_D/I_G$  value, indicating that the higher carbonization temperature leads to higher graphitization degree, in accordance with XRD results.

It is known that the nitrogen functional groups are vital with respect to  $H_2O_2$  generation by ORR on N-doped carbons. Table 1 shows the elemental compositions of NCF650, NCF800, and NCF1000 investigated by XPS. The peaks representing C 1s, O 1s, and N 1s were discovered by the full survey spectra (Figure S1). The C contents increased by increasing the carbonization temperature, while the N and O contents decreased significantly. High-resolution C 1s spectra of NCF650, NCF800, and NCF1000 is shown in Figure 4(a). The peak located at 284.6 eV corresponds to the C=C bond and its intensity and shape are highly correlated with the graphitization degree. Significantly, NCF1000 presents the highest graphitization degree among all the samples, which could be attributed to its highest carbonization temperature. High-resolution N 1s spectra of three samples were deconvoluted into four peaks located at 398.1, 399.2, 401.2, and 402.4 eV, corresponding to pyridinic-N, pyrrolic-N, graphitic-N, and oxidized-N, respectively (Figure 4(b)–4(d)). Due to the relative

**Table 1** | The XPS element contents of NCF650, NCF800, and NCF1000

| Sample  | C (at%) | N (at%) | O (at%) | Na (at%) |
|---------|---------|---------|---------|----------|
| NCF650  | 63.60%  | 7.55%   | 18.39%  | 10.46%   |
| NCF800  | 71.59%  | 4.99%   | 15.92%  | 7.50%    |
| NCF1000 | 91.49%  | 2.62%   | 4.73%   | 1.16%    |

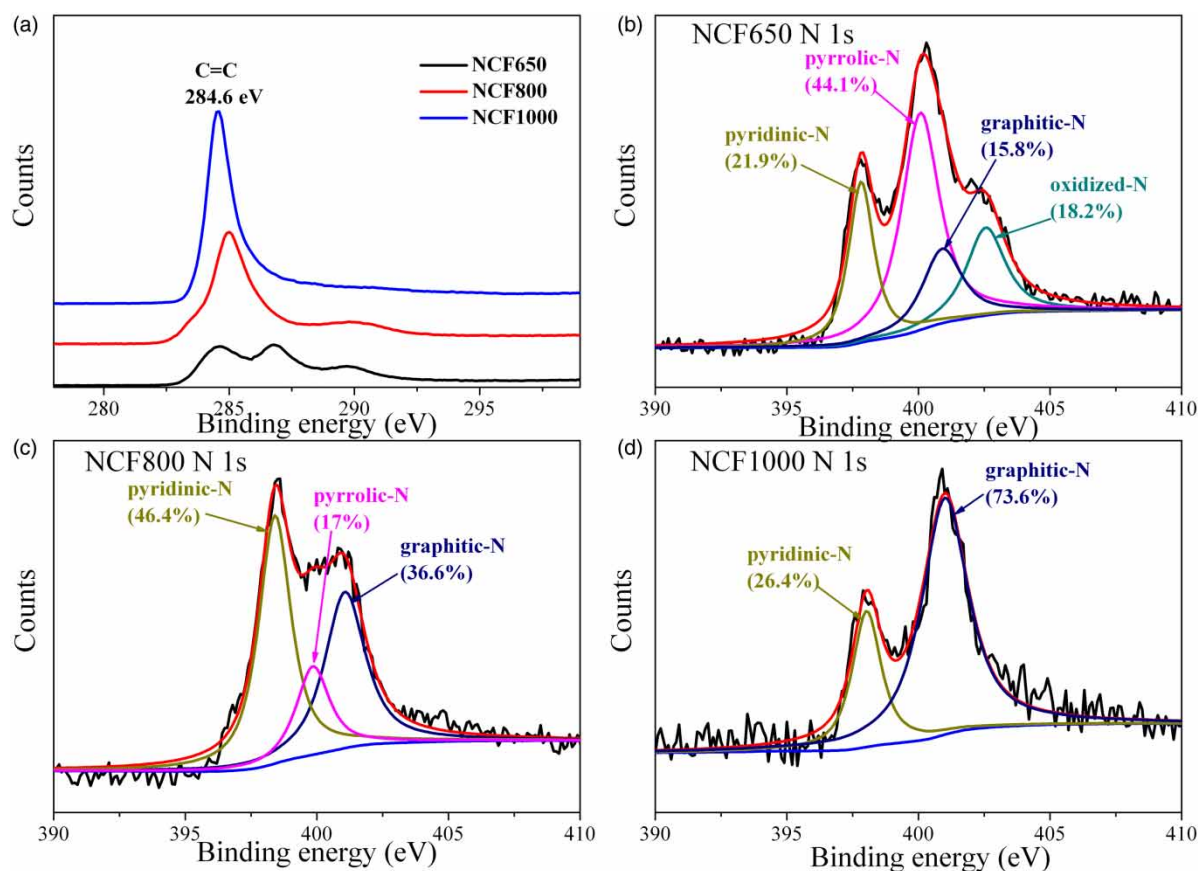

**Figure 4** | (a) High-resolution XPS C 1s spectra of NCF650, NCF800, and NCF1000, the high-resolution XPS N 1s spectra of (b) NCF650, (c) NCF800, and (d) NCF1000.

low carbonization temperature, NCF650 exhibits the lowest C content of only 63.60% and highest N content of 7.55%. However, NCF650 contains large amounts of pyrrolic-N (44.1% of total N) and oxidized-N (18.2% of total N), both of which are considered as non-active nitrogen functional groups with respect to ORR. NCF800, the sample with higher carbonization temperature than NCF650, presents a lower pyrrolic-N content of just 17.0% of total N and the peak corresponding to oxidized-N disappeared. NCF1000 with the highest carbonization temperature even shows an absence of pyrrolic-N. The graphitic-N proportion content of NCF1000 is 73.6% of total N, which is remarkably higher than those of NCF800 (36.6% of total N) and NCF650 (15.8% of total N). The higher graphitic-N proportion of NCF1000 could be ascribed to the higher graphitization degree caused by the higher carbonization temperature. The results indicate that the nitrogen functional groups of NCFs can be tailored by adjusting the carbonization temperature.

### Electrochemical oxygen reduction performance of NCF

The ORR performance of NCFs was first examined by CV experiments. All three samples were used as self-supporting cathodes without any current collector. CV curves for NCF650, NCF800, and NCF1000 were measured in  $N_2$  or  $O_2$  saturated 0.1 M  $Na_2SO_4$  solution (Figure 5). Compared to the CV curves recorded in  $N_2$ -saturated solution, the CV curves of all the samples in  $O_2$ -saturated solution present significantly larger electrochemical reduction current, demonstrating that NCF650, NCF800, and NCF1000 have the ability to electrochemically reduce oxygen. At  $-1.0$  V, the ORR

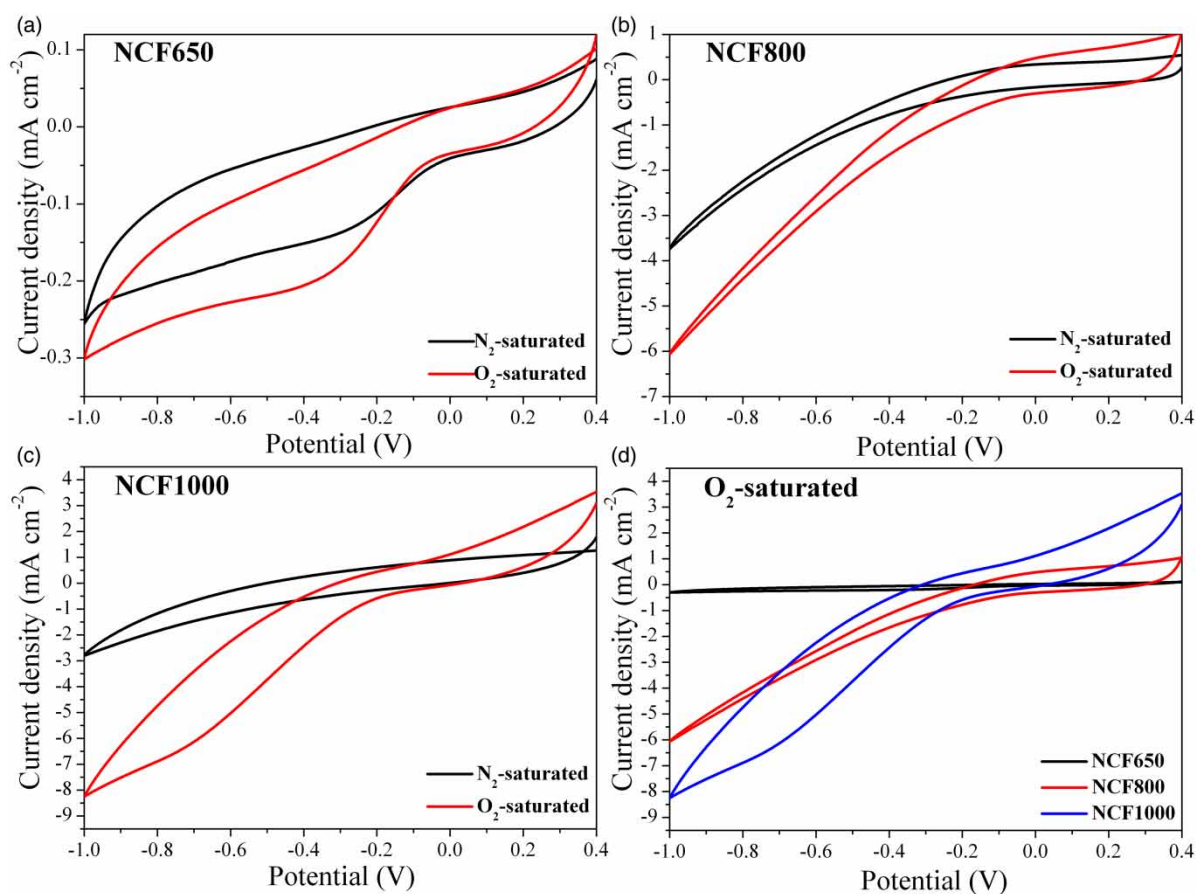

**Figure 5** | CV curves of (a) NCF650, (b) NCF800, and (c) NCF1000 in  $N_2$ -saturated and  $O_2$ -saturated solution, (d) CV curves of NCF650, NCF800, and NCF1000 in  $O_2$ -saturated solution; electrolyte: 0.1 M  $Na_2SO_4$ , pH = 7, scan rate: 10 mV/s, temperature = 25 °C.

current density for NCF650, NCF800, and NCF1000 is 0.05, 2.5, and 5.4 mA cm<sup>-2</sup>, respectively. NCF1000 shows larger ORR current density than other NCFs.

It is known that the O<sub>2</sub> can be reduced through two pathways: two-electron pathway and four-electron pathway (Equations (3) and (4)). Thus, the high selectivity towards the two-electron pathway, which will generate H<sub>2</sub>O<sub>2</sub>, is highly demanded for the cathode in the electro-Fenton system:

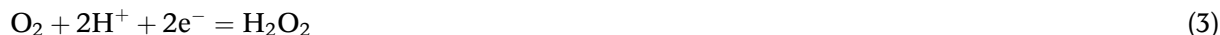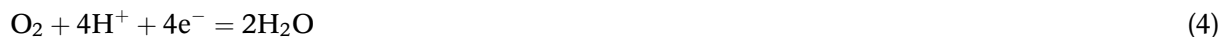

ORR rotating ring-disk electrode (RRDE) system was employed to further investigate the ORR activity and H<sub>2</sub>O<sub>2</sub> selectivity of NCFs. The samples were ground into powder and mixed with Nafion solution (the concentration is 0.5%, diluted by water) to prepare the working electrode. The working electrode was dried at 30 °C overnight. Since the pH of the solution may influence the H<sub>2</sub>O<sub>2</sub> selectivity in ORR, the solutions with the pH range from 6 to 9 were employed in the experiments (Figure 6). It could be noticed that NCF1000 exhibits both the largest ring current density and the largest disk current density at pH 6–9, indicating its best ORR activity. As well, NCF800 shows better activity than NCF650. Taking the XPS results into consideration, the highest ORR activity of NCF1000 could be ascribed to the high proportion content of pyridinic-N and graphitic-N, both of which have been implied as active sites for ORR by other reports.

To be used as an effective cathode in the electro-Fenton process, the electrode should have not only good ORR activity, but also good H<sub>2</sub>O<sub>2</sub> selectivity. Based on the RRDE results, the H<sub>2</sub>O<sub>2</sub> selectivity of

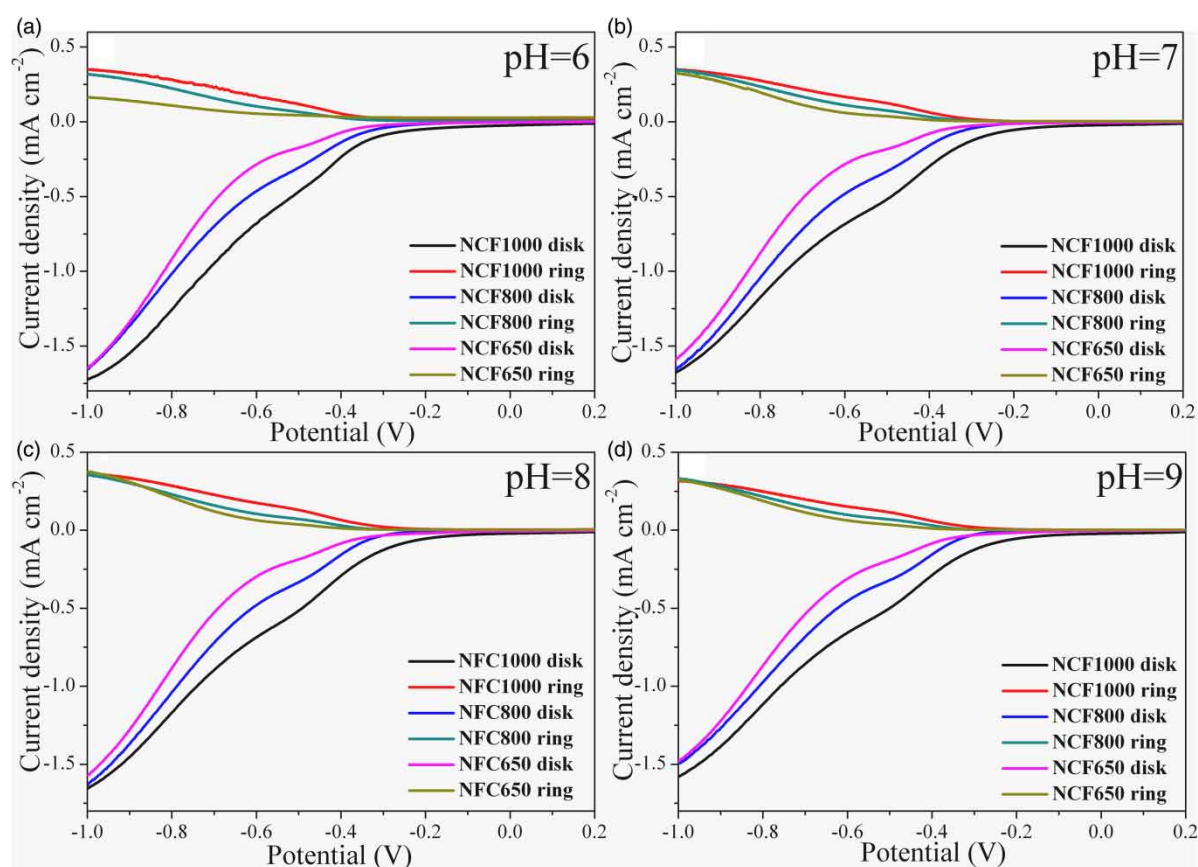

**Figure 6** | (a–d) LSVs of NCF650, NCF800, and NCF1000 on RRDE in the O<sub>2</sub>-saturated solution at (a) pH = 6, (b) pH = 7, (c) pH = 8, and (d) pH = 9, respectively; electrolyte: 0.1 M Na<sub>2</sub>SO<sub>4</sub>, scan rate: 10 mV/s, temperature = 25 °C.



NCF1000 and NCF800 were calculated and shown in Table 2. The highest  $\text{H}_2\text{O}_2$  selectivity of NCF1000 is 81.9% while that of NCF800 is 78.0%. At pH 6–9, the  $\text{H}_2\text{O}_2$  selectivity of NCF1000 remained above 70% and was even higher than recently reported N-doped graphene (75.9%) in pH 7 (Su *et al.* 2019), indicating that it can be used as cathode for  $\text{H}_2\text{O}_2$  generation in neutral medium. Remarkably, both NCF1000 and NCF800 present the highest  $\text{H}_2\text{O}_2$  selectivity at  $-0.6\text{ V}$ .  $\text{H}_2\text{O}_2$  selectivity decreased with the applied potential negative shift, revealing  $-0.6\text{ V}$  may be the optimized working potential.

**Table 2** |  $S_{\text{H}_2\text{O}_2}$  of NCF800 and NCF1000 at pH = 6–9 and different potentials

| Sample         | $S_{\text{H}_2\text{O}_2}$ at $-0.4\text{ V}$ | $S_{\text{H}_2\text{O}_2}$ at $-0.6\text{ V}$ | $S_{\text{H}_2\text{O}_2}$ at $-0.8\text{ V}$ | $S_{\text{H}_2\text{O}_2}$ at $-1.0\text{ V}$ |
|----------------|-----------------------------------------------|-----------------------------------------------|-----------------------------------------------|-----------------------------------------------|
| NCF1000 pH = 6 | 77.3%                                         | 81.8%                                         | 75.6%                                         | 71.9%                                         |
| NCF1000 pH = 7 | 72.8%                                         | 79.8%                                         | 77.4%                                         | 71.9%                                         |
| NCF1000 pH = 8 | 75.7%                                         | 81.9%                                         | 79.5%                                         | 75.0%                                         |
| NCF1000 pH = 9 | 71.8%                                         | 76.9%                                         | 75.4%                                         | 70.4%                                         |
| NCF800 pH = 6  | 71.7%                                         | 78.0%                                         | 77.4%                                         | 70.8%                                         |
| NCF800 pH = 7  | 71.0%                                         | 77.0%                                         | 76.1%                                         | 72.3%                                         |
| NCF800 pH = 8  | 68.3%                                         | 74.5%                                         | 75.1%                                         | 74.1%                                         |
| NCF800 pH = 9  | 69.9%                                         | 74.3%                                         | 74.8%                                         | 75.1%                                         |

Based on all the experiment results above, it is suggested N-doped carbons could electrochemically reduce oxygen to  $\text{H}_2\text{O}_2$  in neutral medium and NCFs show the potential to be used as cathode in the electro-Fenton system in neutral medium.

### Electrochemical $\text{H}_2\text{O}_2$ generation on NCF

The  $\text{H}_2\text{O}_2$  generation tests were conducted in a two-chamber reaction with a proton exchange membrane. The working potential was  $-0.6\text{ V}$  and the initial pH was 7. Figure 7 shows the  $\text{H}_2\text{O}_2$  concentration and the current efficiency for  $\text{H}_2\text{O}_2$  production on all three samples. Significantly, the NCF1000 displayed higher  $\text{H}_2\text{O}_2$  generation rate than those of NCF800 and NCF650. The current efficiency for  $\text{H}_2\text{O}_2$  production on NCF1000 at 5 min, 10 min, and 15 min was 76.4%, 73.7%, and

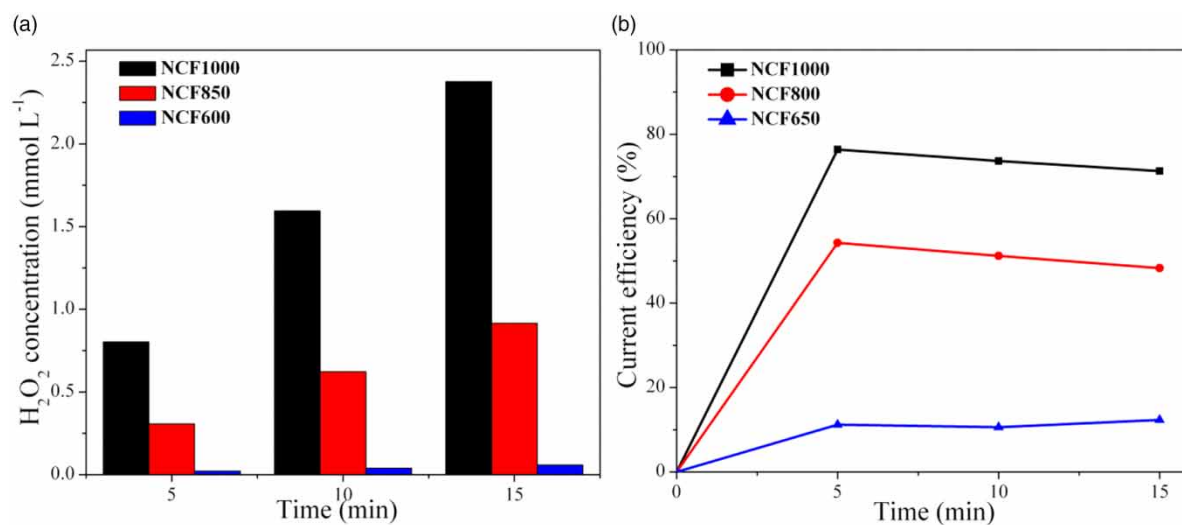

**Figure 7** | (a)  $\text{H}_2\text{O}_2$  concentration and (b) current efficiency of NCF650, NCF800, and NCF1000 for  $\text{H}_2\text{O}_2$  production in a two-chamber reactor; electrolyte: 0.1 M  $\text{Na}_2\text{SO}_4$ , pH = 7, working potential:  $-0.6\text{ V}$ ,  $\text{O}_2$  flow rate: 300 mL/min, temperature = 25 °C.

71.3%, which were close to the RRDE results. However, the current efficiency for  $\text{H}_2\text{O}_2$  production on NCF800 was 54.3%–48.3%, which is significantly lower than the  $\text{H}_2\text{O}_2$  selectivity calculated from RRDE results. As well, NCF650 only presents the current efficiency for  $\text{H}_2\text{O}_2$  production of 12.2%–10.4%. Since the NCFs were used as self-supporting cathodes without any current collector or binder, the low current efficiency of NCF650 and NCF800 could be due to the poor conductivity resulting from the relatively low graphitization degree. Thus, NCF1000 is the sample with the best  $\text{H}_2\text{O}_2$  production performance among all the samples. Furthermore, the performance of NCF1000 was also compared to those of the cathodes reported by current literature (Table S1). It can be noticed that the NCF1000 shows higher CE than other carbon-based materials, such as hierarchically porous carbon and graphene (Zhang *et al.* 2018; Yu *et al.* 2019), demonstrating its superior performance in neutral medium.

To evaluate the potential ability of NCF1000 as cathode in electro-Fenton system,  $\text{H}_2\text{O}_2$  production on NCF1000 was conducted in a one-chamber reactor at working potential of  $-0.4$  V to  $-0.8$  V under pH 7 (Figure 8). The  $\text{H}_2\text{O}_2$  concentration achieved the max concentration at 60 min of electrolysis, which might be caused by the decomposition of  $\text{H}_2\text{O}_2$  on the anode in the one-chamber reactor. The highest  $\text{H}_2\text{O}_2$  concentration on NCF1000 was  $0.87 \text{ mmol L}^{-1}$  while the working potential was  $-0.6$  V. Thus,  $-0.6$  V was the optimized working potential and therefore was applied in the following experiments.

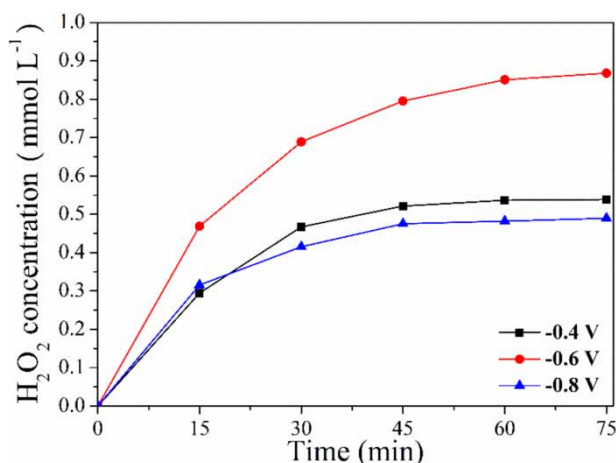

**Figure 8** |  $\text{H}_2\text{O}_2$  concentration curves of NCF1000 at different working potentials; electrolyte: 0.1 M  $\text{Na}_2\text{SO}_4$ , pH = 7,  $\text{O}_2$  flow rate: 300 mL/min, temperature = 25 °C.

The  $\text{H}_2\text{O}_2$  generation on NCF1000 at pH 6–9 was also tested to evaluate the performance of NCF1000 in neutral medium (Figure S2). It can be noticed that the  $\text{H}_2\text{O}_2$  concentration on NCF1000 remained stable, demonstrating that the NCF1000 could electrochemically reduce oxygen to  $\text{H}_2\text{O}_2$  in the neutral solution at pH 6–9.

For comparison, the performances of graphite electrode, carbon cloth, and carbon felt for electro-Fenton were also tested under the same condition. The properties of these electrodes can be seen in Table S2. As shown in Figure 9, the  $\text{H}_2\text{O}_2$  concentration on NCF1000 at 60 min was 1.8 times as much as that on graphite, 2 times as much as that on carbon cloth, and 2.6 times as much as that on carbon felt. NCF1000 exhibits significantly better  $\text{H}_2\text{O}_2$  generation performance than these commercial materials, indicating its potential ability to be used as the cathode in the electro-Fenton system for wastewater treatment.

The origin of the better  $\text{H}_2\text{O}_2$  generation performance of NCF1000 compared to other commercial carbon-based materials was further discussed. First, due to the high carbonization temperature and the N-containing precursor, the NCF1000 presents 73.6% graphitic-N of total N and high

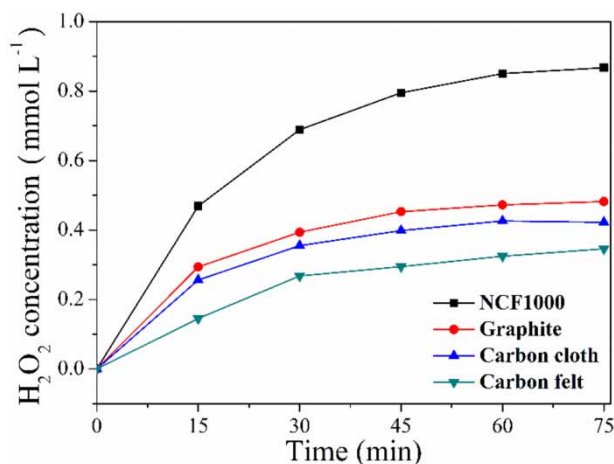

**Figure 9** | H<sub>2</sub>O<sub>2</sub> concentration curves of NCF1000, graphite, carbon cloth, and carbon felt at  $-0.6$  V in one-chamber reactor; electrolyte:  $0.1$  M Na<sub>2</sub>SO<sub>4</sub>, pH = 7, O<sub>2</sub> flow rate:  $300$  mL/min, temperature =  $25$  °C.

graphitization degree, both of which result in the chemically active sites on NCF1000 for O<sub>2</sub> reduction. Second, the three-dimensional structure of the NCF1000 may lead to a large surface area, which will facilitate the mass transfer. To further reveal the morphology of NCF1000, the N<sub>2</sub> adsorption-desorption isotherm of NCF1000 was measured to investigate the Brunauer-Emmett-Teller (BET) surface area and the pore-size distribution (Figure S3). The BET surface area and total pore volume of NCF1000 are  $1,343$  m<sup>2</sup>/g and  $0.235$  cm<sup>3</sup>/g, respectively. The large BET surface area may contribute to the better H<sub>2</sub>O<sub>2</sub> generation performance of NCF1000.

#### Removal of organic pollutants on NCF

To evaluate the electron-Fenton performance on NCF1000 in neutral medium, simulated phenol wastewater with an initial phenol concentration of  $20$  mg L<sup>-1</sup> was treated by NCF1000. For comparison, the graphite electrode was also tested under the same condition. Commercial FeOOH was selected as the Fenton-like catalyst and the loading mass was  $0.5$  g L<sup>-1</sup>. As shown in Figure 10(a), without the presence of O<sub>2</sub>, the phenol removal efficiency on NCF1000 in 60 min was only 30%.

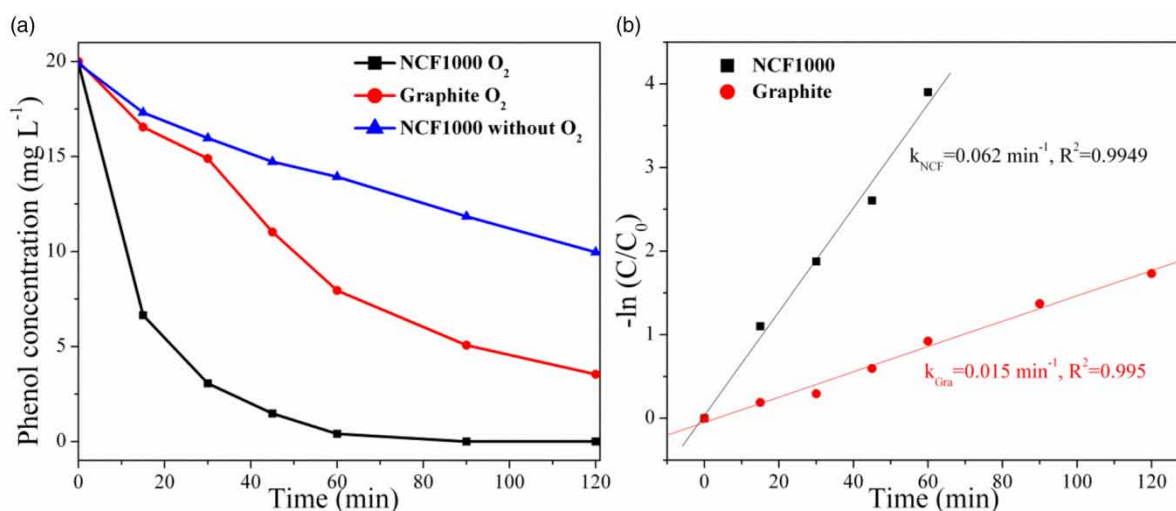

**Figure 10** | (a) Phenol removal of NCF-1000 with O<sub>2</sub>, NCF-1000 without O<sub>2</sub> and, graphite with O<sub>2</sub>, and (b) kinetics curves of NCF-1000 and graphite for phenol removal; electrolyte:  $0.1$  M Na<sub>2</sub>SO<sub>4</sub>, pH = 7, O<sub>2</sub> flow rate:  $300$  mL/min, working potential:  $-0.6$  V, initial phenol concentration:  $20$  mg/L, FeOOH dosage:  $0.5$  g/L, temperature =  $25$  °C.

However, the NCF1000 as cathode in  $O_2$ -saturated solution can remove 98% of phenol in 60 min. These results indicate the highly efficient removal of phenol could be attributed to catalytic electro-Fenton process. Moreover, with commercial graphite as cathode, the process can only remove 60% of phenol in 60 min. The apparent rate constant for phenol removal on NCF1000 was  $0.062 \text{ min}^{-1}$ , which is 4.1 times higher than that of commercial graphite electrode. Recently reported studies for phenol degradation in neutral medium can be seen in Table S3; the performance of NCF1000 is comparable to some reported studies. The mineralization of phenol on NCF1000 and graphite was also evaluated. As shown in Figure 11, the TOC removal efficiency of 68% was achieved on NCF1000 after 5 h reaction while the TOC removal efficiency on the graphite electrode was just 44% at a similar reaction time. These results reveal that NCF1000 demonstrates the better performance as cathode in the electro-Fenton system than graphite electrode, demonstrating the practical potential of NCF1000.

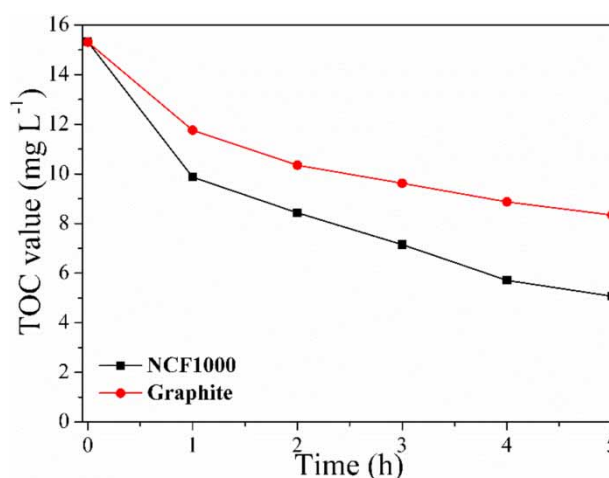

**Figure 11** | TOC removal on NCF1000 and graphite; electrolyte: 0.1 M  $Na_2SO_4$ , pH = 7,  $O_2$  flow rate: 300 mL/min, working potential:  $-0.6 \text{ V}$ , initial phenol concentration: 20 mg/L,  $FeOOH$  dosage: 0.5 g/L, temperature = 25 °C.

To investigate the origin of the good phenol removal performance on NCF1000, EPR tests were conducted in the absence of pollutants. First, the test with NCF1000 as cathode at  $-0.6 \text{ V}$  was measured in  $N_2$ -saturated solution and no signal of any radicals was found in the curve, as shown in Figure 12.

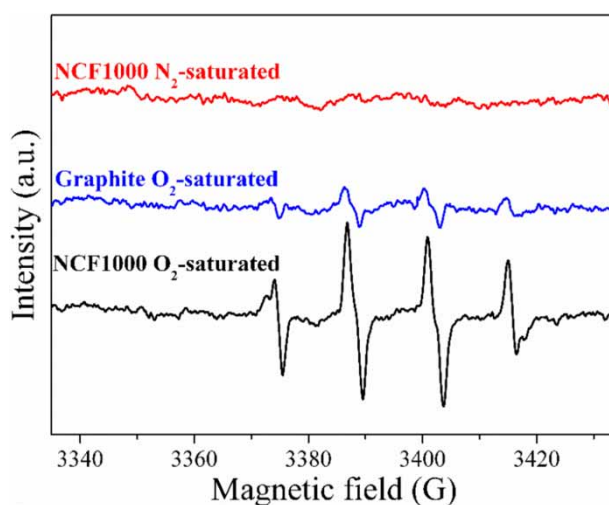

**Figure 12** | EPR curves of NCF1000 and graphite in  $N_2$ -saturated or  $O_2$ -saturated solution; electrolyte: 0.1 M  $Na_2SO_4$ , pH = 7,  $O_2$  flow rate: 300 mL/min, working potential:  $-0.6 \text{ V}$ ,  $FeOOH$  dosage: 0.5 g/L, temperature = 25 °C.



Then, the electrolyte was replaced by  $O_2$ -saturated solution and the four-fold peak with an intensity ratio of 1:2:2:1 was observed, which corresponds to the DMPO-OH signal. This result indicates that  $\cdot OH$  plays a vital role in the enhanced performance on NCF1000 in  $O_2$ -saturated solution. Furthermore, the graphite electrode was also tested and the intensity of the peak was much lower than that of NCF1000. Thus, the better performance of NCF1000 compared to graphite could be attributed to the larger amount of  $\cdot OH$ , which results from the higher  $H_2O_2$  concentration produced by NCF1000.

The reusability of NCF1000 was evaluated by repeating the treatment for ten times at  $-0.6$  V and  $pH = 7$  with  $0.5$  g  $L^{-1}$  of  $FeOOH$ . As shown in Figure 13, the phenol removal efficiency on NCF1000 after ten times' treatment shows no visible attenuation, demonstrating the good reusability of NCF1000.

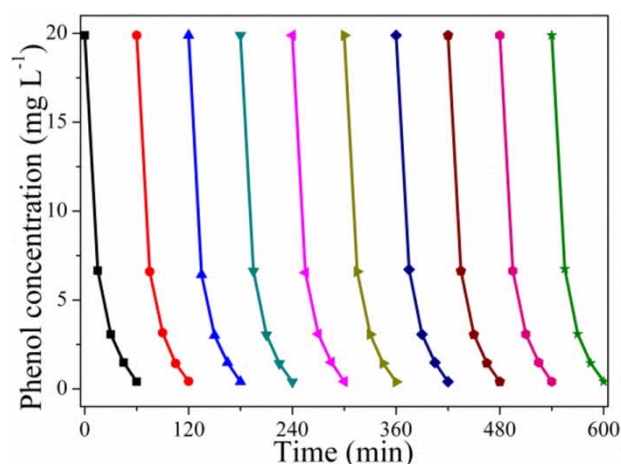

**Figure 13** | Phenol removal on NCF1000 for ten times; electrolyte:  $0.1$  M  $Na_2SO_4$ ,  $pH = 7$ ,  $O_2$  flow rate:  $300$  mL/min, working potential:  $-0.6$  V, initial phenol concentration:  $20$  mg/L,  $FeOOH$  dosage:  $0.5$  g/L, temperature =  $25$  °C.

The electro-Fenton system in neutral solution can be used to remove various organic pollutants from wastewater. To evaluate the feasibility of NCF1000 as cathode in the electro-Fenton system for various organic pollutants' removal, atrazine and bisphenol A were selected as target pollutants to conduct the experiments. The concentration of both atrazine and bisphenol A was  $20$  mg  $L^{-1}$ . Graphite electrode was also tested as a counterpart and all the experiments were conducted at optimal conditions ( $-0.6$  V,  $pH$  7,  $0.5$  g  $L^{-1}$   $FeOOH$ ,  $0.1$  M  $Na_2SO_4$  with  $O_2$ -saturated). As shown in Figure 14, 97% of the bisphenol A could be removed by electro-Fenton system with NCF1000 as cathode after 150 min treatment, whereas the bisphenol A removal efficiency on graphite electrode was just 85%. After 180 min treatment, the atrazine removal efficiency on NCF1000 was 91% while the electro-Fenton system with graphite as cathode could only achieve a removal efficiency of 79%. The results demonstrate that NCF1000 as cathode in the electro-Fenton system in neutral medium exhibits better pollutants' removal performance than commercial graphite electrode for the treatment of various organic pollutants.

The real wastewater was also treated by the electro-Fenton process with NCF1000 as cathode. Real secondary effluent of refinery wastewater with COD value of  $94$  mg/L was received from a local factory. Since the conductivity of the wastewater was  $2.06$  mS/cm and the  $pH$  was  $7.7$ , the wastewater was directly used in the treatment without adding chemicals to adjust the  $pH$  or improve the conductivity. The other treatment conditions were the same as those in the above experiments. As shown in Figure S4, after 6 h reaction, NCF1000 achieved a COD value of  $45$  mg/L, which is lower than that of graphite electrode ( $58$  mg/L) and also lower than the limit of wastewater discharge in China (GB 18918-2002,  $50$  mg/L). This result indicated the better performance of NCF1000 over that of commercial graphite in real wastewater treatment.

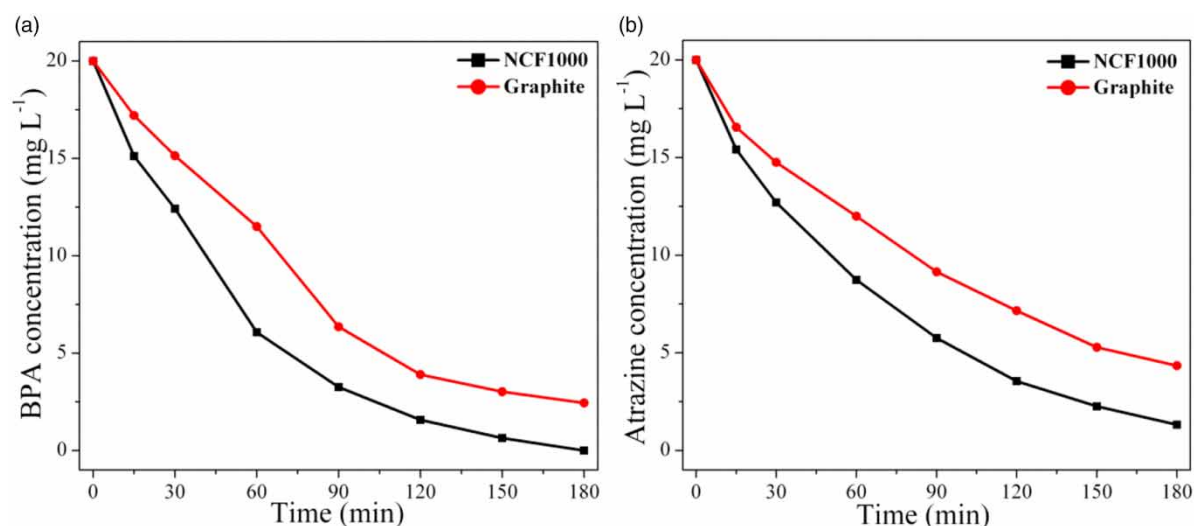

**Figure 14** | Electro-Fenton removal of (a) bisphenol A and (b) atrazine; electrolyte: 0.1 M Na<sub>2</sub>SO<sub>4</sub>, pH = 7, O<sub>2</sub> flow rate: 300 mL/min, working potential: -0.6 V, initial pollutant concentration: 20 mg/L, FeOOH dosage: 0.5 g/L, temperature = 25 °C.

## CONCLUSIONS

N-doped three-dimensional carbon foam electrode was prepared by carbonizing melamine foam under Ar atmosphere and it showed good performance as the cathode in the electro-Fenton system for organic pollutants' removal in neutral medium. NCF1000, the sample carbonized at 1,000 °C, presents the best activity and selectivity of H<sub>2</sub>O<sub>2</sub> production among all the NCFs and several commercial electrodes. Used as the cathode in the electro-Fenton system in neutral medium, NCF1000 exhibits phenol removal kinetic rate of 0.062 min<sup>-1</sup>, which is 4.1 times larger than that of commercial graphite electrode. NCF1000 also shows better performance than graphite for atrazine and bisphenol A removal. The enhanced performance could be attributed to the high yield of H<sub>2</sub>O<sub>2</sub> production on NCF1000 in neutral medium, which may result from the three-dimensional structure, high graphitization degree, and the high proportion contents of pyridinic-N and graphitic-N. This work provides a new insight into the design of highly efficient and low-cost electrodes for the electro-Fenton system in neutral medium.

## ACKNOWLEDGEMENTS

This work was supported by National Natural Science Foundation of China (21590813), Department of Science & Technology of Dalian (2018J11CY012), the Program of Introducing Talents of Discipline to Universities (B13012), and programme for Changjiang Scholars and Innovative Research Team in University (IRT\_13R05).

## REFERENCES

- Chen, S., He, G., Hu, H., Jin, S., Zhou, Y., He, Y., He, S., Zhao, F. & Hou, H. 2013 Elastic carbon foam via direct carbonization of polymer foam for flexible electrodes and organic chemical absorption. *Energy & Environmental Science* **6** (8), 2435.
- Fellinger, T.-P., Hasché, F., Strasser, P. & Antonietti, M. 2012 Mesoporous nitrogen-doped carbon for the electrocatalytic synthesis of hydrogen peroxide. *Journal of the American Chemical Society* **134** (9), 4072–4075.
- Hammouda, S. B., Fourcade, F., Assadi, A., Soutrel, I., Adhoum, N., Amrane, A. & Monser, L. 2016 Effective heterogeneous electro-Fenton process for the degradation of a malodorous compound, indole, using iron loaded alginate beads as a reusable catalyst. *Applied Catalysis B: Environmental* **182**, 47–58.

- Jiang, J., Li, G., Li, Z., Zhang, X. & Zhang, F. 2016 An Fe–Mn binary oxide (FMBO) modified electrode for effective electrochemical advanced oxidation at neutral pH. *Electrochimica Acta* **194**, 104–109.
- Jirkovský, J. S., Panas, I., Ahlberg, E., Halasa, M., Romani, S. & Schiffrin, D. J. 2011 Single atom hot-spots at Au–Pd nanoalloys for electrocatalytic H<sub>2</sub>O<sub>2</sub> production. *Journal of the American Chemical Society* **133** (48), 19432–19441.
- Khataee, A. R., Safarpour, M., Zarei, M. & Aber, S. 2011 Electrochemical generation of H<sub>2</sub>O<sub>2</sub> using immobilized carbon nanotubes on graphite electrode fed with air: investigation of operational parameters. *Journal of Electroanalytical Chemistry* **659** (1), 63–68.
- Le, T. X. H., Charmette, C., Bechelany, M. & Cretin, M. 2016 Facile preparation of porous carbon cathode to eliminate paracetamol in aqueous medium using electro-Fenton system. *Electrochimica Acta* **188**, 378–384.
- Lee, Y.-H., Li, F., Chang, K.-H., Hu, C.-C. & Ohsaka, T. 2012 Novel synthesis of N-doped porous carbons from collagen for electrocatalytic production of H<sub>2</sub>O<sub>2</sub>. *Applied Catalysis B: Environmental* **126**, 208–214.
- Li, J., Ai, Z. & Zhang, L. 2009 Design of a neutral electro-Fenton system with Fe@Fe<sub>2</sub>O<sub>3</sub>/ACF composite cathode for wastewater treatment. *Journal of Hazardous Materials* **164** (1), 18–25.
- Liao, Y., Gao, Y., Zhu, S., Zheng, J., Chen, Z., Yin, C., Lou, X. & Zhang, D. 2015 Facile fabrication of N-doped graphene as efficient electrocatalyst for oxygen reduction reaction. *ACS Applied Materials and Interfaces* **7** (35), 19619–19625.
- Liu, Y., Chen, S., Quan, X., Yu, H., Zhao, H. & Zhang, Y. 2015a Efficient mineralization of perfluorooctanoate by electro-Fenton with H<sub>2</sub>O<sub>2</sub> electro-generated on hierarchically porous carbon. *Environmental Science & Technology* **49** (22), 13528–13533.
- Liu, Y., Quan, X., Fan, X., Wang, H. & Chen, S. 2015b High-yield electrosynthesis of hydrogen peroxide from oxygen reduction by hierarchically porous carbon. *Angewandte Chemie International Edition* **54** (23), 6837–6841.
- Liu, X., Li, L., Zhou, W., Zhou, Y., Niu, W. & Chen, S. 2015c High-performance electrocatalysts for oxygen reduction based on nitrogen-doped porous carbon from hydrothermal treatment of glucose and dicyandiamide. *ChemElectroChem* **2** (6), 803–810.
- López-Salas, N., Gutiérrez, M. C., Ania, C. O., Muñoz-Márquez, M. A., Luisa Ferrer, M. & Monte, F. d. 2016 Nitrogen-doped carbons prepared from eutectic mixtures as metal-free oxygen reduction catalysts. *Journal of Materials Chemistry A* **4** (2), 478–488.
- Luo, H., Li, C., Wu, C., Zheng, W. & Dong, X. 2015 Electrochemical degradation of phenol by in situ electro-generated and electro-activated hydrogen peroxide using an improved gas diffusion cathode. *Electrochimica Acta* **186**, 486–495.
- Moreira, F. C., Garcia-Segura, S., Boaventura, R. A. R., Brillas, E. & Vilar, V. J. P. 2014 Degradation of the antibiotic trimethoprim by electrochemical advanced oxidation processes using a carbon-PTFE air-diffusion cathode and a boron-doped diamond or platinum anode. *Applied Catalysis B: Environmental* **160–161**, 492–505.
- Moreira, F. C., Boaventura, R. A. R., Brillas, E. & Vilar, V. J. P. 2017 Electrochemical advanced oxidation processes: a review on their application to synthetic and real wastewaters. *Applied Catalysis B: Environmental* **202**, 217–261.
- Nidheesh, P. V. & Gandhimathi, R. 2012 Trends in electro-Fenton process for water and wastewater treatment: an overview. *Desalination* **299**, 1–15.
- Noffke, B. W., Li, Q., Raghavachari, K. & Li, L.-s. 2016 A model for the pH-dependent selectivity of the oxygen reduction reaction electrocatalyzed by N-doped graphitic carbon. *Journal of the American Chemical Society* **138** (42), 13923–13929.
- Park, J., Nabae, Y., Hayakawa, T. & Kakimoto, M.-A. 2014 Highly selective two-electron oxygen reduction catalyzed by mesoporous nitrogen-doped carbon. *ACS Catalysis* **4** (10), 3749–3754.
- Perazzolo, V., Durante, C., Pilot, R., Paduano, A., Zheng, J., Rizzi, G. A., Martucci, A., Granozzi, G. & Gennaro, A. 2015 Nitrogen and sulfur doped mesoporous carbon as metal-free electrocatalysts for the in situ production of hydrogen peroxide. *Carbon* **95**, 949–963.
- Plakas, K. V., Sklari, S. D., Yiankakis, D. A., Sideropoulos, G. T., Zaspalis, V. T. & Karabelas, A. J. 2016 Removal of organic micropollutants from drinking water by a novel electro-Fenton filter: pilot-scale studies. *Water Research* **91**, 183–194.
- Sheng, X., Daems, N., Geboes, B., Kurttepe, M., Bals, S., Breugelmanns, T., Hubin, A., Vankelecom, I. F. J. & Pescarmona, P. P. 2015 N-doped ordered mesoporous carbons prepared by a two-step nanocasting strategy as highly active and selective electrocatalysts for the reduction of O<sub>2</sub> to H<sub>2</sub>O<sub>2</sub>. *Applied Catalysis B: Environmental* **176–177**, 212–224.
- Sklari, S. D., Plakas, K. V., Petsi, P. N., Zaspalis, V. T. & Karabelas, A. J. 2015 Toward the development of a novel electro-Fenton system for eliminating toxic organic substances from water. Part 2. Preparation, characterization, and evaluation of iron-impregnated carbon felts as cathodic electrodes. *Industrial & Engineering Chemistry Research* **54** (7), 2059–2073.
- Su, P., Zhou, M., Lu, X., Yang, W., Ren, G. & Cai, J. 2019 Electrochemical catalytic mechanism of N-doped graphene for enhanced H<sub>2</sub>O<sub>2</sub> yield and in-situ degradation of organic pollutant. *Applied Catalysis B: Environmental* **245**, 583–595.
- Sun, M., Chen, F., Qu, J., Liu, H. & Liu, R. 2015 Optimization and control of electro-Fenton process by pH inflection points: a case of treating acrylic fiber manufacturing wastewater. *Chemical Engineering Journal* **269**, 399–407.
- Wang, Y., Zhao, G., Chai, S., Zhao, H. & Wang, Y. 2013 Three-dimensional homogeneous ferrite-carbon aerogel: one pot fabrication and enhanced electro-Fenton reactivity. *ACS Applied and Material Interfaces* **5** (3), 842–852.
- Wang, L., Cao, M., Ai, Z. & Zhang, L. 2015a Design of a highly efficient and wide pH electro-Fenton oxidation system with molecular oxygen activated by ferrous–tetrapolyphosphate complex. *Environmental Science & Technology* **49** (5), 3032–3039.
- Wang, Y., Liu, Y., Wang, K., Song, S., Tsiakaras, P. & Liu, H. 2015b Preparation and characterization of a novel KOH activated graphite felt cathode for the electro-Fenton process. *Applied Catalysis B: Environmental* **165**, 360–368.

- Wei, W., Liang, H., Parvez, K., Zhuang, X., Feng, X. & Müllen, K. 2014 Nitrogen-doped carbon nanosheets with size-defined mesopores as highly efficient metal-free catalyst for the oxygen reduction reaction. *Angewandte Chemie International Edition* **53** (6), 1570–1574.
- Xu, A., Han, W., Li, J., Sun, X., Shen, J. & Wang, L. 2016 Electrogeneration of hydrogen peroxide using Ti/IrO<sub>2</sub>-Ta<sub>2</sub>O<sub>5</sub> anode in dual tubular membranes Electro-Fenton reactor for the degradation of tricyclazole without aeration. *Chemical Engineering Journal* **295**, 152–159.
- Yang, K. S., Mul, G. & Moulijn, J. A. 2007 Electrochemical generation of hydrogen peroxide using surface area-enhanced Ti-mesh electrodes. *Electrochimica Acta* **52** (22), 6304–6309.
- Yu, F., Wang, Y. & Ma, H. 2019 Enhancing the yield of H<sub>2</sub>O<sub>2</sub> from oxygen reduction reaction performance by hierarchically porous carbon modified active carbon fiber as an effective cathode used in electro-Fenton. *Journal of Electroanalytical Chemistry* **838**, 57–65.
- Zhang, X., Fu, J., Zhang, Y. & Lei, L. 2008 A nitrogen functionalized carbon nanotube cathode for highly efficient electrocatalytic generation of H<sub>2</sub>O<sub>2</sub> in Electro-Fenton system. *Separation and Purification Technology* **64** (1), 116–123.
- Zhang, G., Wang, S., Zhao, S., Fu, L., Chen, G. & Yang, F. 2011 Oxidative degradation of azo dye by hydrogen peroxide electrogenerated in situ on anthraquinonemonosulphonate/polypyrrole composite cathode with heterogeneous CuO/ $\gamma$ -Al<sub>2</sub>O<sub>3</sub> catalyst. *Applied Catalysis B: Environmental* **106** (3–4), 370–378.
- Zhang, C., Zhou, M., Yu, X., Ma, L. & Yu, F. 2015a Modified iron-carbon as heterogeneous electro-Fenton catalyst for organic pollutant degradation in near neutral pH condition: characterization, degradation activity and stability. *Electrochimica Acta* **160**, 254–262.
- Zhang, C., Zhou, M., Ren, G., Yu, X., Ma, L., Yang, J. & Yu, F. 2015b Heterogeneous electro-Fenton using modified iron-carbon as catalyst for 2,4-dichlorophenol degradation: influence factors, mechanism and degradation pathway. *Water Research* **70**, 414–424.
- Zhang, H., Zhou, Y., Li, C., Chen, S., Liu, L., Liu, S., Yao, H. & Hou, H. 2015c Porous nitrogen doped carbon foam with excellent resilience for self-supported oxygen reduction catalyst. *Carbon* **95**, 388–395.
- Zhang, Z., Meng, H., Wang, Y., Shi, L., Wang, X. & Chai, S. 2018 Fabrication of graphene@graphite-based gas diffusion electrode for improving H<sub>2</sub>O<sub>2</sub> generation in Electro-Fenton process. *Electrochimica Acta* **260**, 112–120.
- Zhao, H., Qian, L., Guan, X., Wu, D. & Zhao, G. 2016 Continuous bulk FeCuC aerogel with ultradispersed metal nanoparticles: an efficient 3D heterogeneous electro-Fenton cathode over a wide range of pH 3–9. *Environmental Science & Technology* **50** (10), 5225–5233.
- Zhao, K., Quan, X., Chen, S., Yu, H., Zhang, Y. & Zhao, H. 2018a Enhanced electro-Fenton performance by fluorine-doped porous carbon for removal of organic pollutants in wastewater. *Chemical Engineering Journal* **354**, 606–615.
- Zhao, K., Su, Y., Quan, X., Liu, Y., Chen, S. & Yu, H. 2018b Enhanced H<sub>2</sub>O<sub>2</sub> production by selective electrochemical reduction of O<sub>2</sub> on fluorine-doped hierarchically porous carbon. *Journal of Catalysis* **357**, 118–126.
- Zhou, L., Hu, Z., Zhang, C., Bi, Z., Jin, T. & Zhou, M. 2013 Electrogeneration of hydrogen peroxide for electro-Fenton system by oxygen reduction using chemically modified graphite felt cathode. *Separation and Purification Technology* **111**, 131–136.

First received 23 April 2019; accepted in revised form 25 August 2019. Available online 18 September 2019
